# Supplementary material
Source: publisher figshare collection journal article supplement (https://geolsoc.figshare.com/articles/dataset/_/3454130)

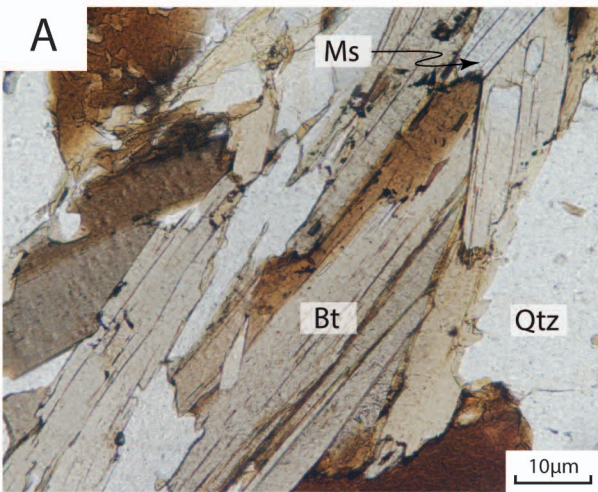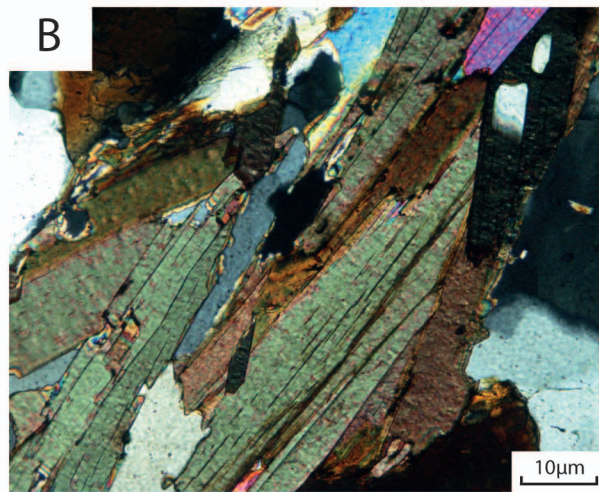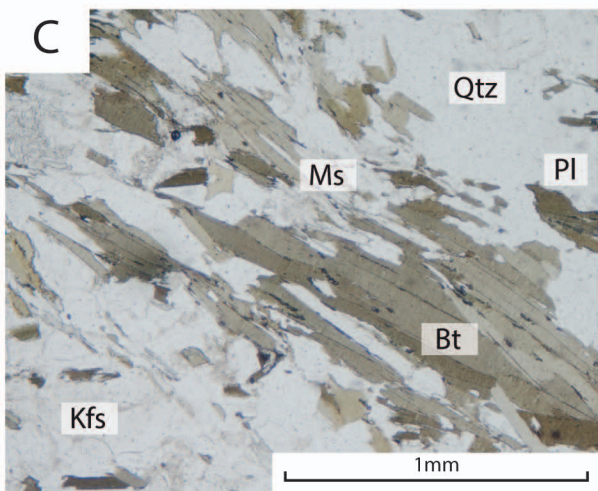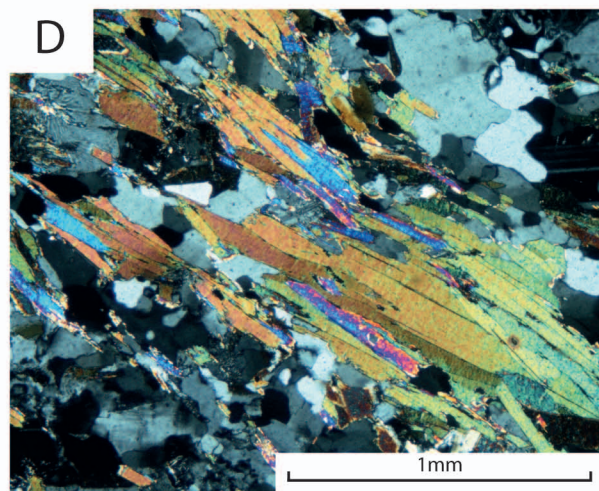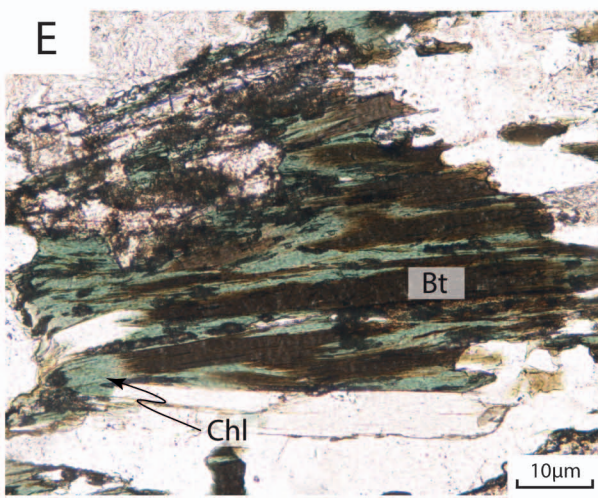

Supplement: Supplementary file 1 [file 1]

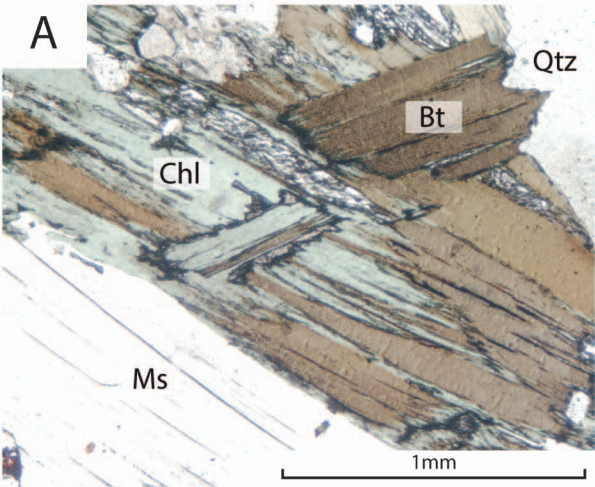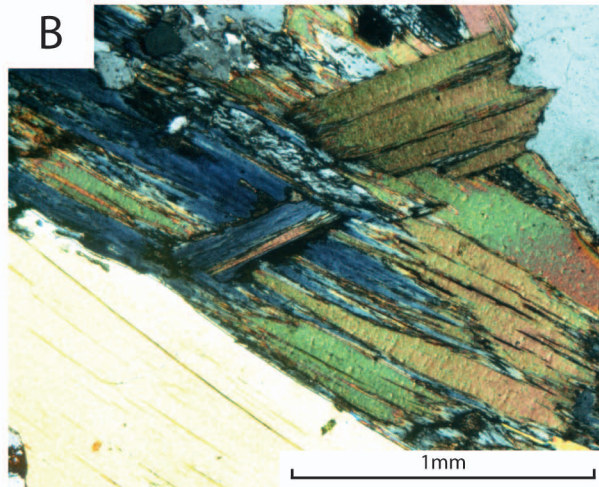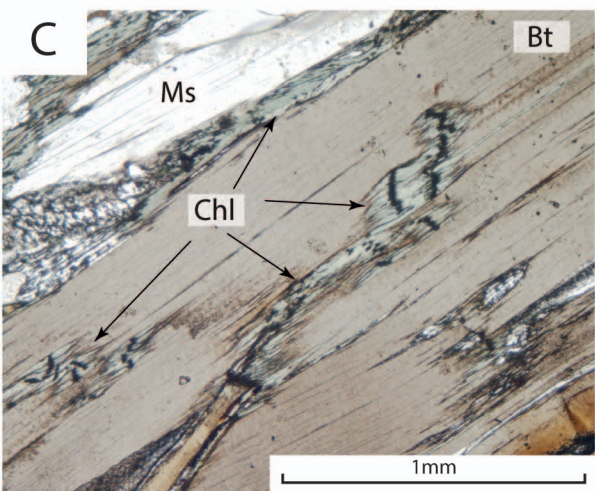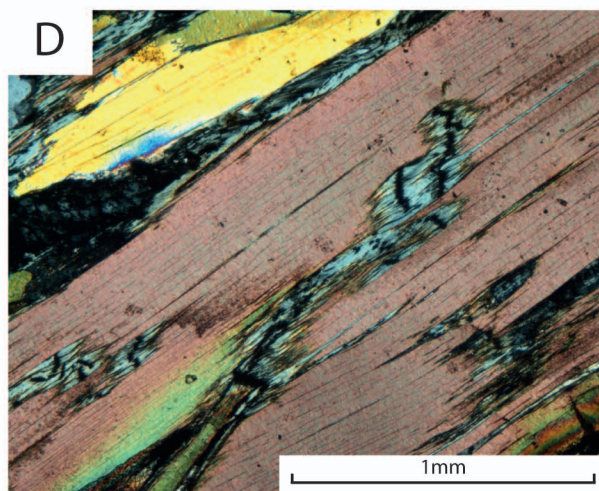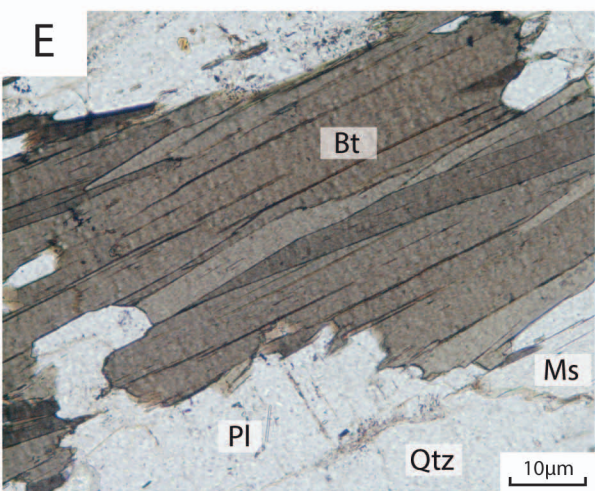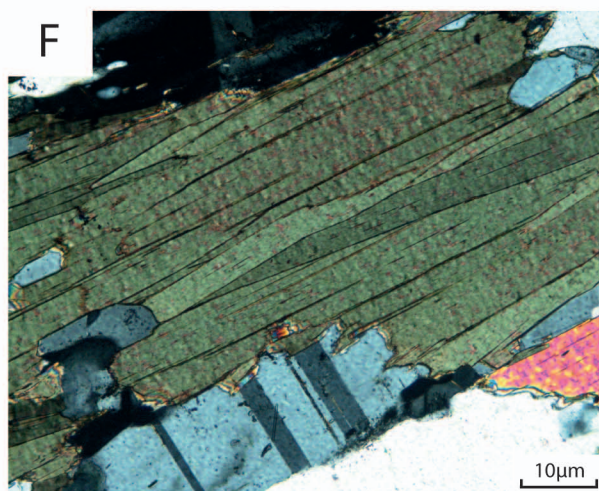

Supplement: Supplementary file 3 [file 1]

A

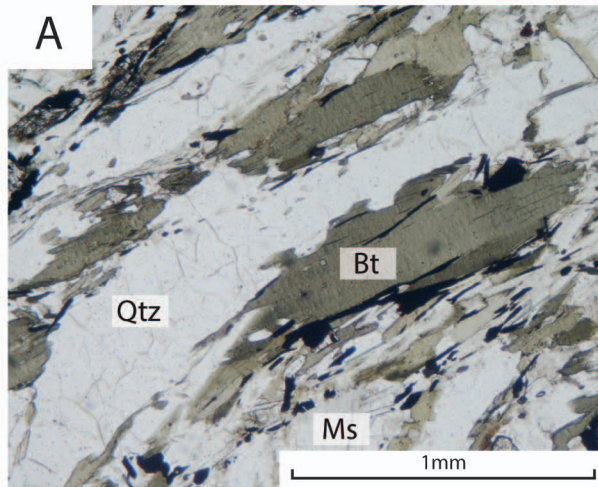

B

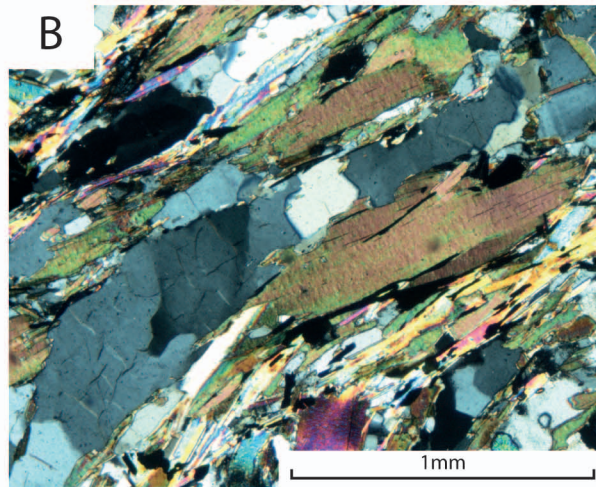

C

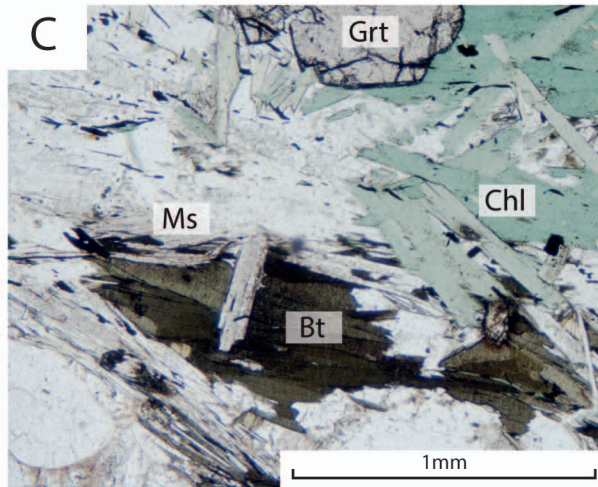

D

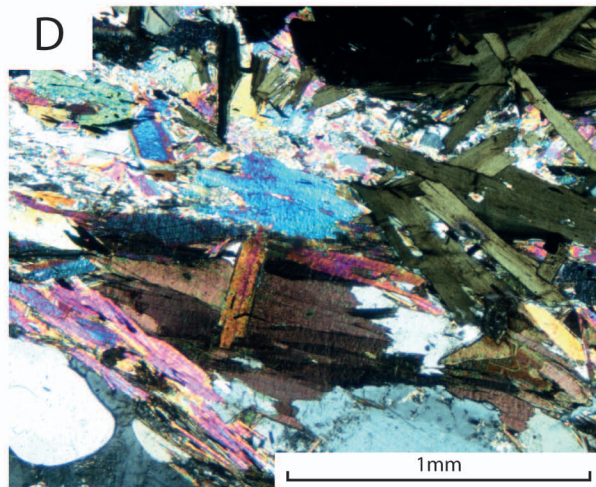

Supplement: Supplementary file 4 [file 1]
